# Supplementary material for: Reproduction of the Cancer Genome Atlas (TCGA) and Asian Cancer Research Group (ACRG) Gastric Cancer Molecular Classifications and Their Association with Clinicopathological Characteristics and Overall Survival in Moroccan Patients
Source: Hindawi journal article supplement (doi:10.1155/2021/9980410), 2021-07-28
Supplement: f1 [file 9980410.f1.pdf]

Figure 2 (supplementary material)

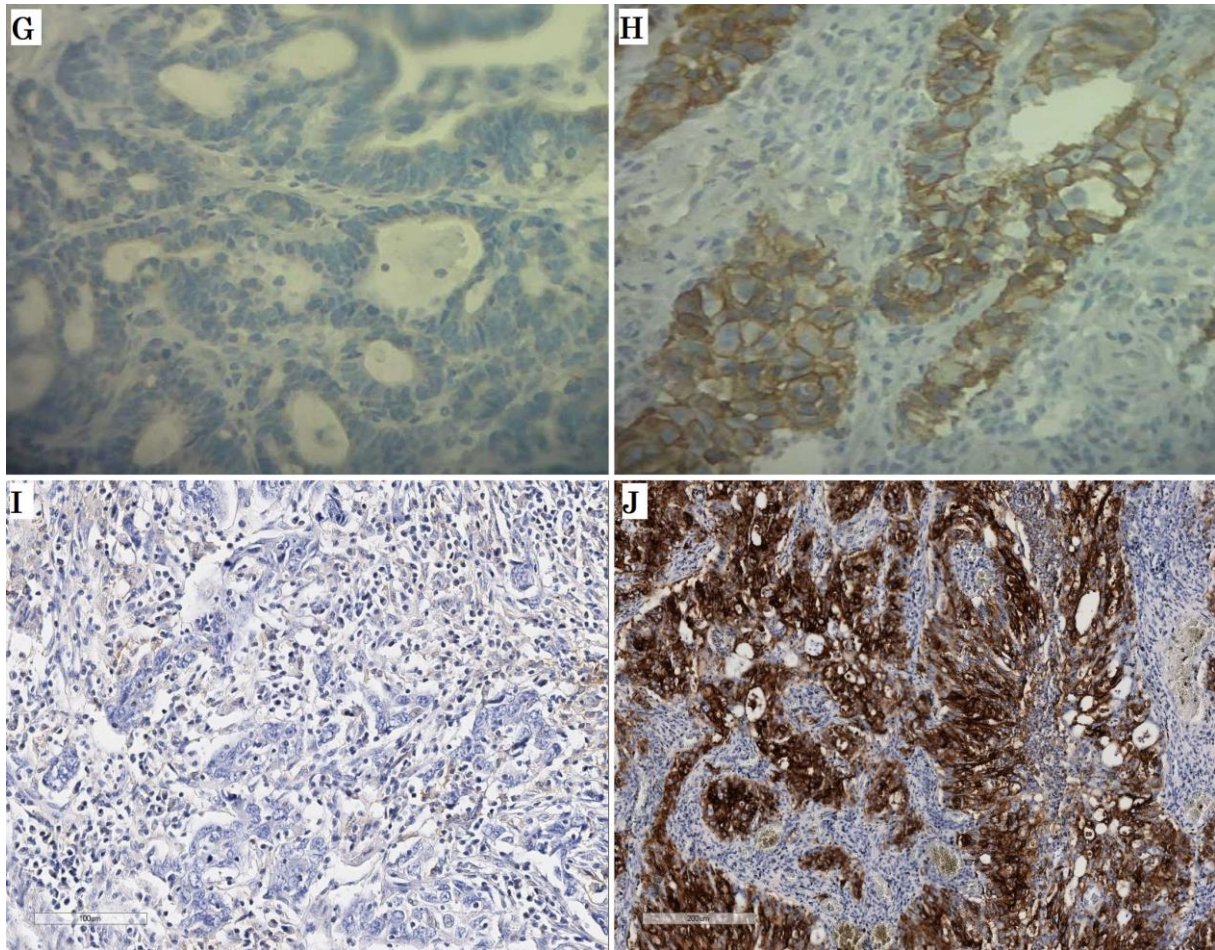

Immunohistochemical analysis: (G) HER2 negative, (H): HER2 positive, (I) PD-L1 negative and (J) PD-L1 positive (magnification x400).
